# Supplementary material for: PopulusPtERF85 Balances Xylem Cell Expansion and Secondary Cell Wall Formation in Hybrid Aspen
Source: Cells. 2021 Aug 3;10(8):1971. doi: 10.3390/cells10081971 (PMC8393460; doi:10.3390/cells10081971)
Supplement: Supplementary file 1 [file cells-10-01971-s001.zip]

Archive with 4 entries (4 files):
- 20200114_Supplement_Table.xlsx
- __MACOSX/._20200114_Supplement_Table.xlsx
- Supplemental Figures_ERF85_revision_corrected.pdf
- __MACOSX/._Supplemental Figures_ERF85_revision_corrected.pdf
